# Supplementary material
Source: publisher figshare collection journal article supplement (https://frontiersin.figshare.com/ndownloader/files/13649048)
Supplement: Supplementary file [file 13649048]

## SUPPLEMENTAL MATERIAL

**Supplementary Table 1.** List of antibodies used in this study

| ID        | Company | Description | Host    | Antigen recognized           | AR |
|-----------|---------|-------------|---------|------------------------------|----|
| ab14356   | Abcam   | Anti-NPRA   | Rb (pc) | aa 294-308 of h-NPRA         | +  |
| ab55724   | Abcam   | Anti-NPRB   | Ms (mc) | aa 131-231 of h-NPRB         | +  |
| ab37617   | Abcam   | Anti-NPRC   | Rb (pc) | aa 67-97 (N terminal) h-NPRC | +  |
| ab19646   | Abcam   | Anti-BNP    | Rb (pc) | h-BNP                        | +  |
| ab91250   | Abcam   | Anti-ANP    | Rb (pc) | aa 30-56 of h-ANP            | –  |
| HPA035362 | Sigma   | Anti-NPPC   | Rb (pc) | aa 29-126 of h-CNP           | +  |

Abbreviations: Rb: rabbit; Ms: mouse; pc: polyclonal; mc: monoclonal; AR: antigen retrieval; h: human and aa: amino acid.

**Supplementary Table 2.** Semi-quantitative comparison of staining signals in different cell structures between AD patients and controls

|                                                                                                | ANP     | BNP     | CNP       | NPR-A     | NPR-B     | NPR-C     |
|------------------------------------------------------------------------------------------------|---------|---------|-----------|-----------|-----------|-----------|
| <i>% +scores in AD patients / % +scores in controls, n=23 (13 controls and 10 AD patients)</i> |         |         |           |           |           |           |
| Neurons                                                                                        | 100/100 | 100/100 | 100/100   | 100/100   | 100/100   | 100/100   |
| Astrocyte-like shapes                                                                          | 100/100 | 0/0     | 10/0      | 70/23.1   | 60/31     | 60/23     |
|                                                                                                |         |         | (p=0.244) | (p=0.024) | (p=0.161) | (p=0.072) |
| Leptomeningeal vessels                                                                         | 100/100 | 100/100 | 0/0       | 100/100   | 100/100   | 100/90    |
|                                                                                                |         |         |           |           |           | (p=0.305) |

Each subject was scored as present (+) or absent (-) of signal for each protein. The percentage of +/- scorings were used to compare between AD patients and controls. P-values were calculated using chi-squared test.

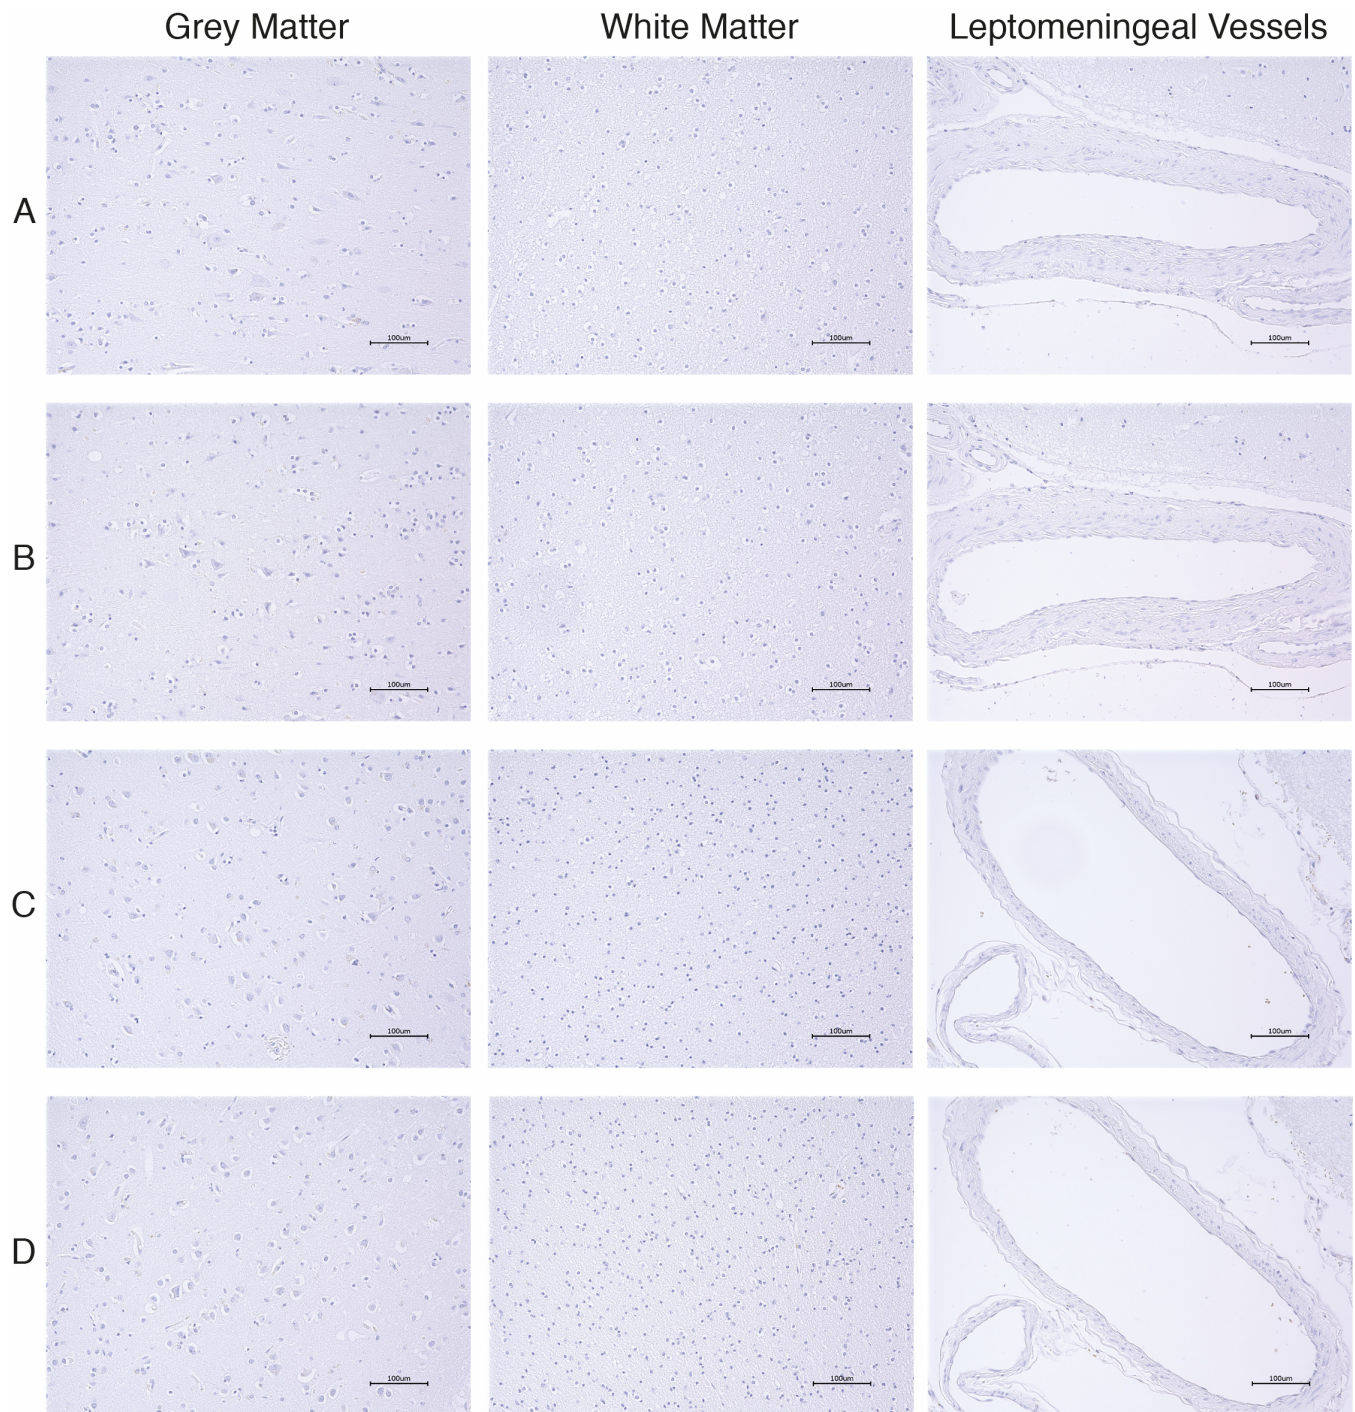

**Supplementary Figure 1. Negative controls treated only with secondary antibodies**

A) Frontal cortex of a control subject incubated only with secondary goat anti rabbit antibody and B) secondary rabbit anti mouse antibody. C) Frontal cortex of an AD patient incubated only with secondary goat anti rabbit antibody and D) secondary rabbit anti mouse antibody



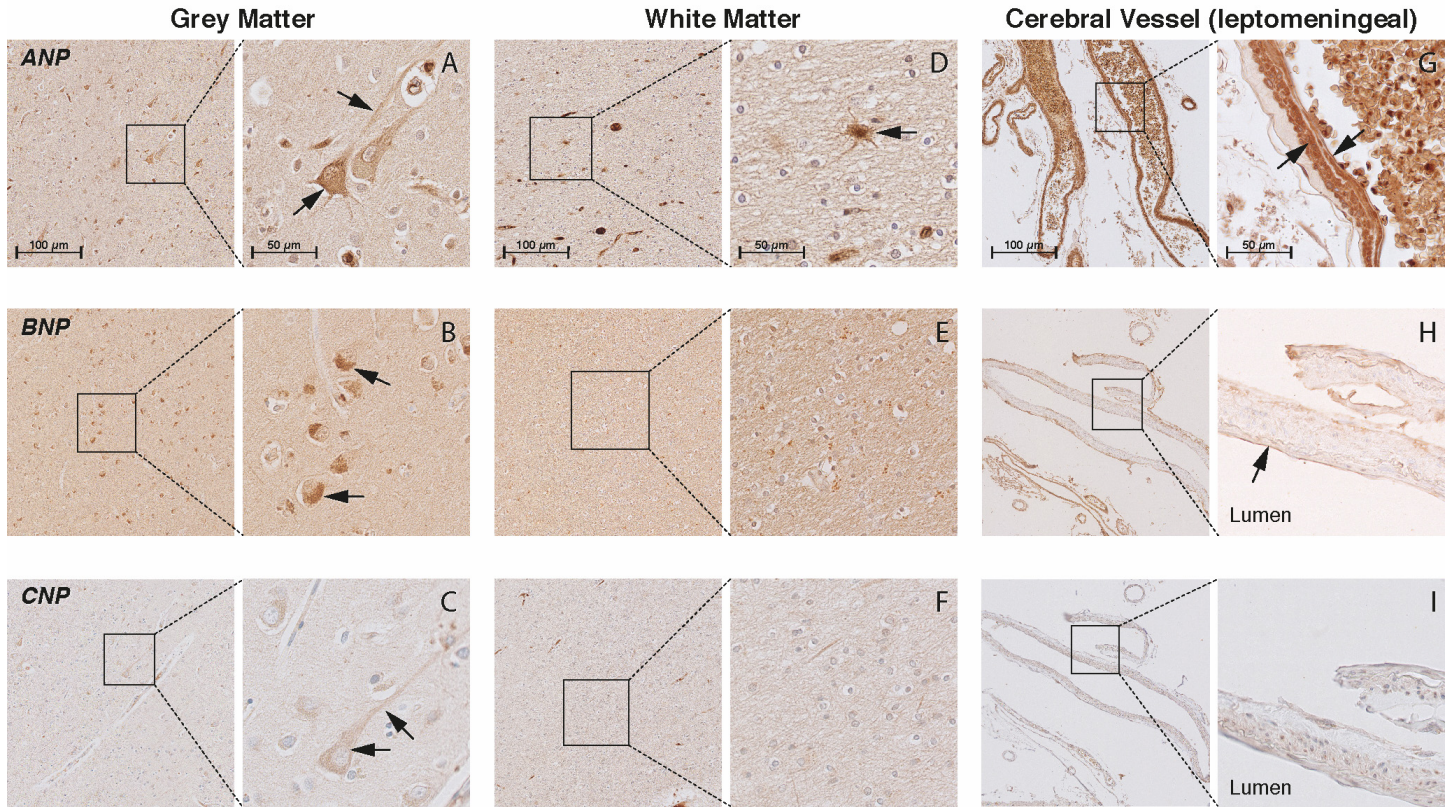

**Supplementary Figure 2. Localization of ANP, BNP and CNP in the frontal lobe of AD subjects**

A, B and C) ANP, BNP and CNP-positive neurons. Arrows point to cytoplasm (ANP and CNP), neuronal processes (ANP, and CNP) and Nissle bodies (BNP); D) ANP-positive astrocyte-like cells in the white matter; E and F) negative BNP and CNP staining in the white matter; G) ANP-positive endothelium and smooth muscles; H) BNP-positive endothelium and I) negative CNP staining in the leptomeningeal vessels.



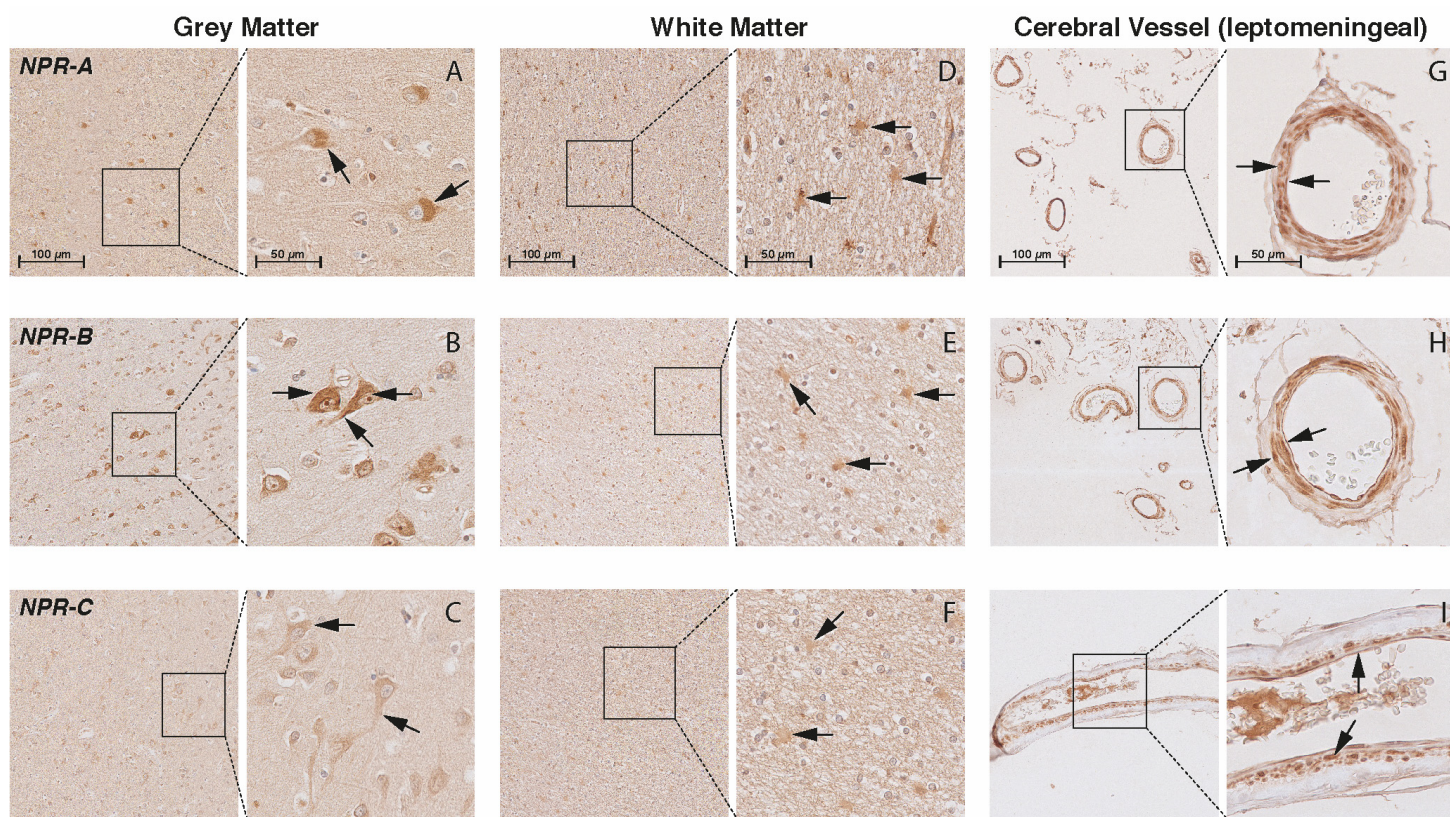

**Supplementary Figure 3. Localization of NPR-A, NPR-B and NPR-C in the frontal lobe of AD subjects**  
A, B and C) NPR-A, NPR-B and NPR-C-positive neurons. Arrows point to cytoplasm (all NPR), neuronal processes (all NPR) and Nissl bodies (NPR-A); D, E and F) NPR-A, NPR-B and NPR-C-positive astrocyte-like cells in the white matter; G, H and I) NPR-A, NPR-B and NPR-C-positive endothelium and smooth muscles in leptomeningeal vessels



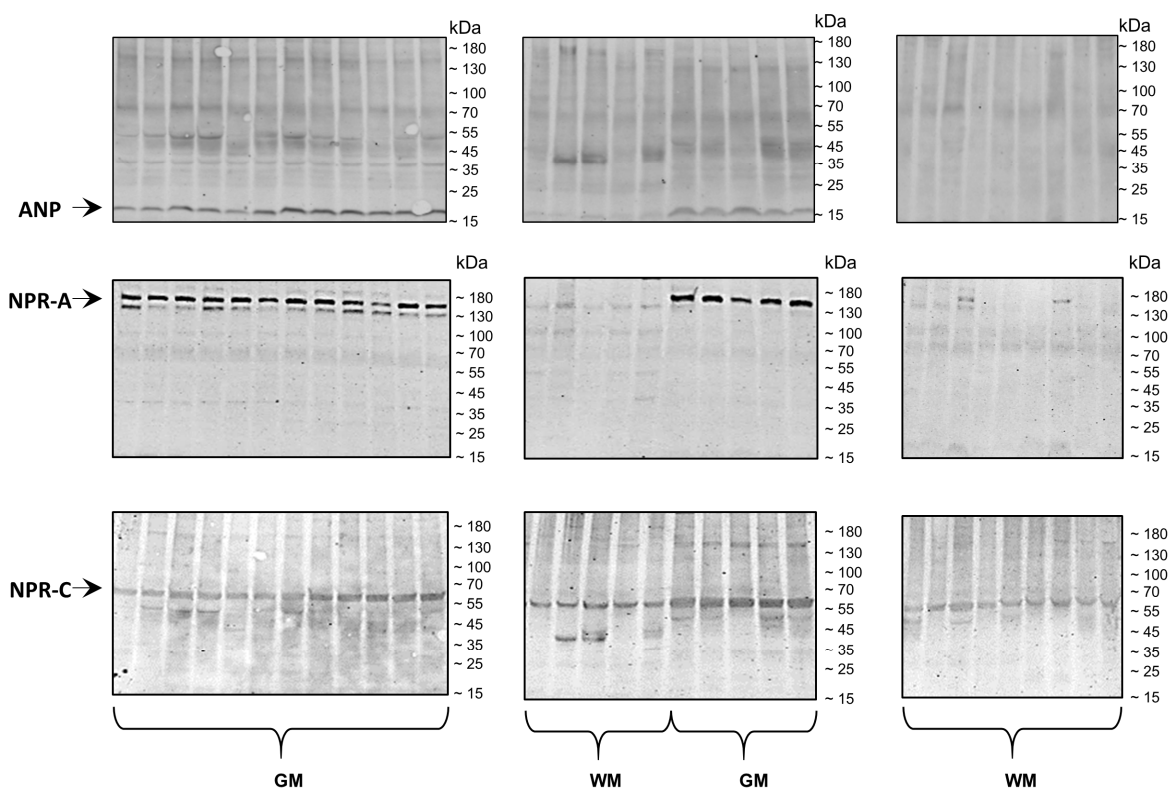

**Supplementary Figure 4. Western blots of ANP, NPR-A and NPR-C.** Each subject has one band corresponding to grey matter and one band corresponding to white matter. All images were scanned using the Image Studio software with the same resolution and image quality. Abbreviations: ANP: atrial natriuretic peptide; NPR-A: natriuretic peptide receptor A; NPR-C: natriuretic peptide receptor C; GM: grey matter and WM: white matter.
